# Supplementary material for: Supramolecular assemblies of 2-hydroxy-3-naphthoic acid and N-heterocycles via various strong hydrogen bonds and weak X⋯π (X = C–H, π) interactions
Source: Royal Society of Chemistry journal article supplement (doi:10.1039/c5ra03837e), 2015-01-01
Supplement: c5ra03837e1.pdf [file c5ra03837e1.pdf]

## Supporting information for this article:

### IR curves

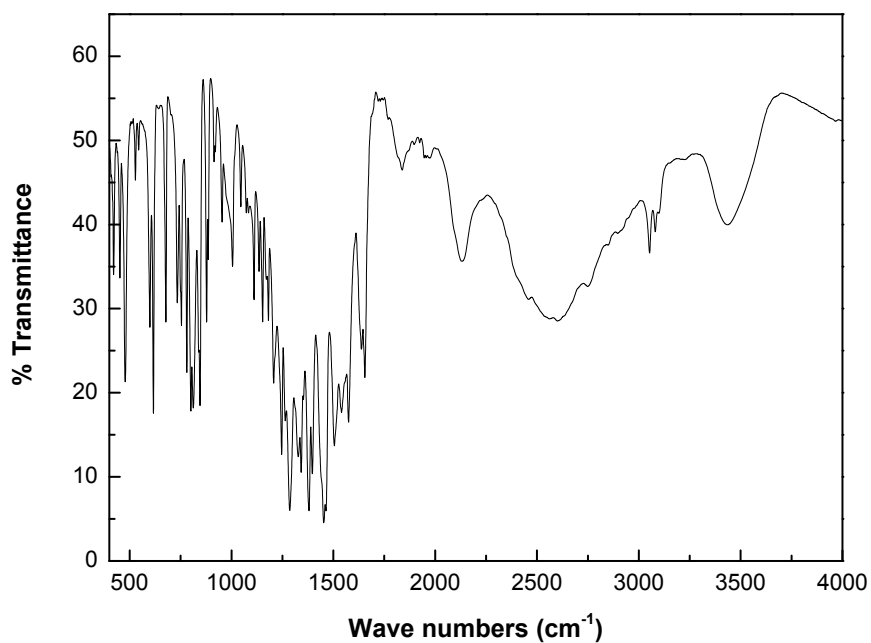

The IR curve of 1

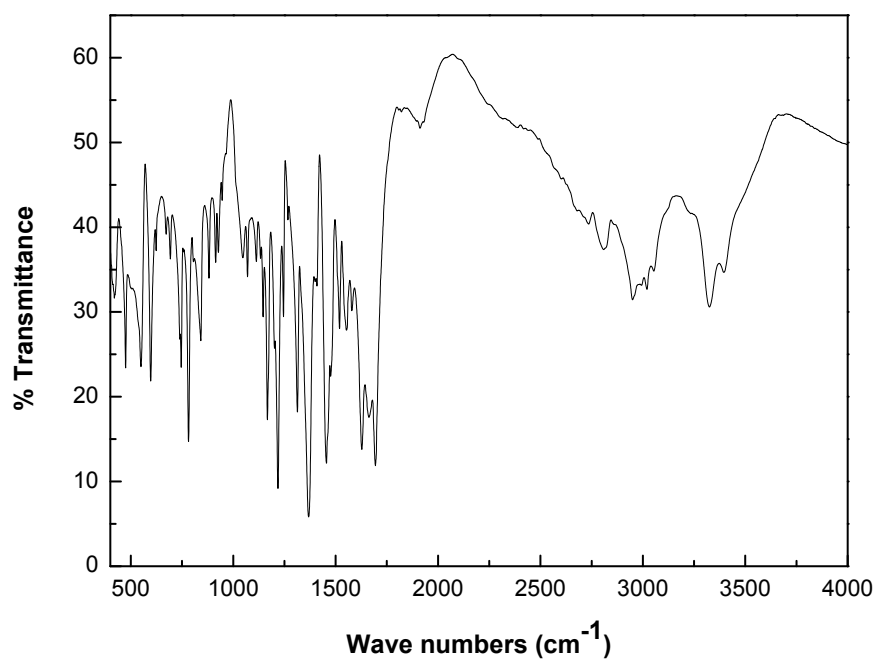

The IR curve of 2

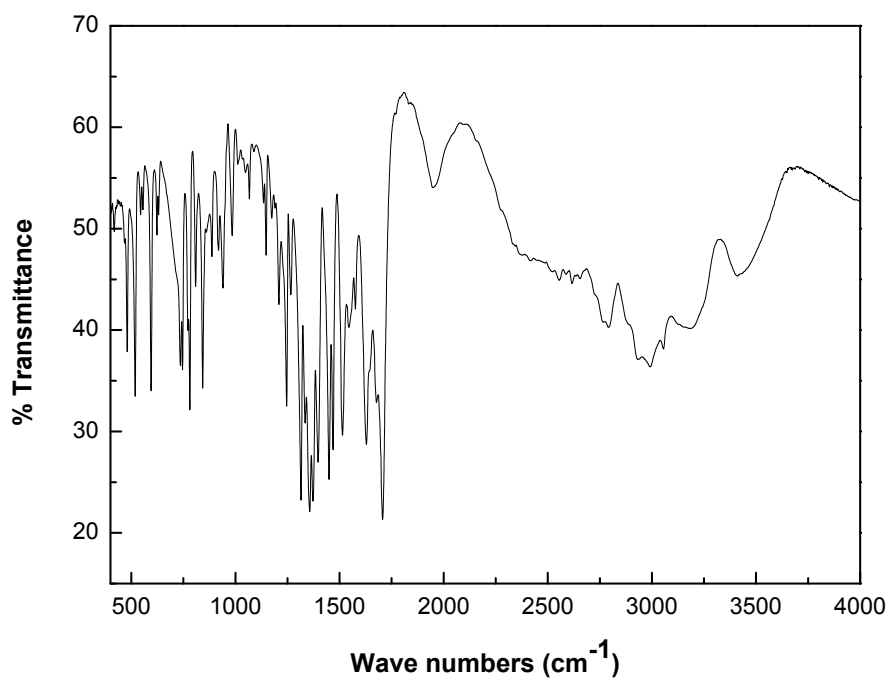

The IR curve of 3

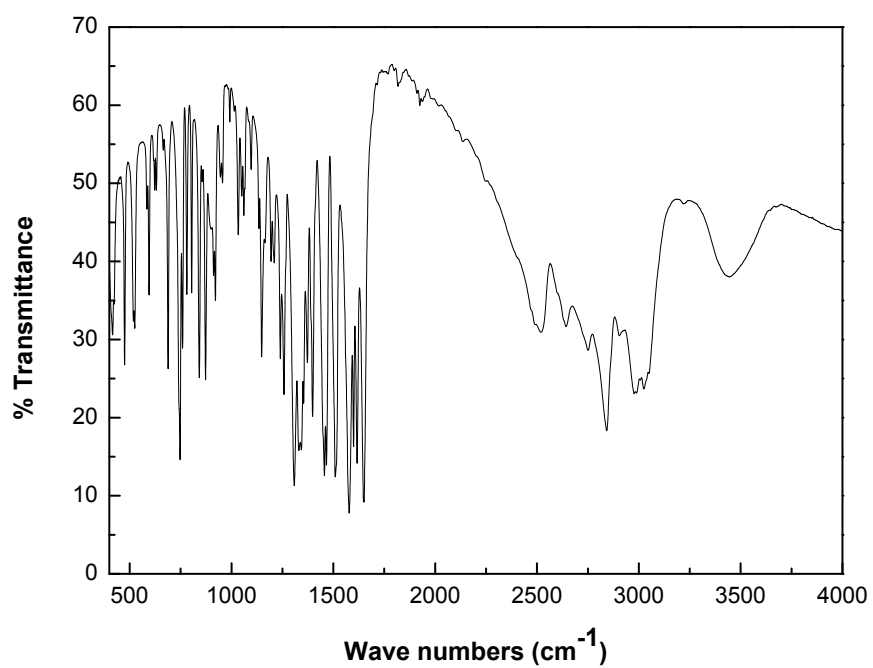

The IR curve of 4

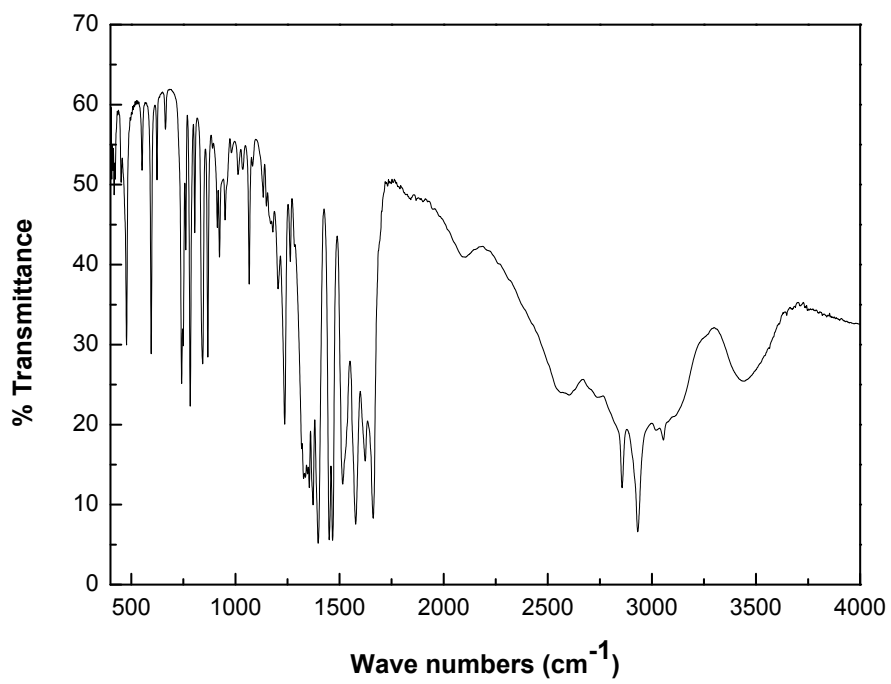

The IR curve of 5

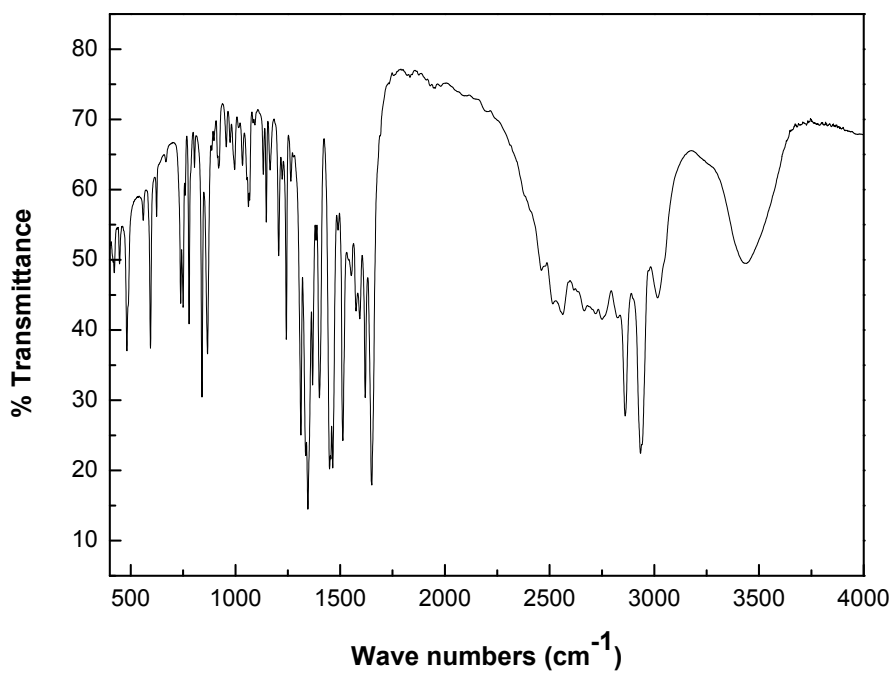

The IR curve of 6

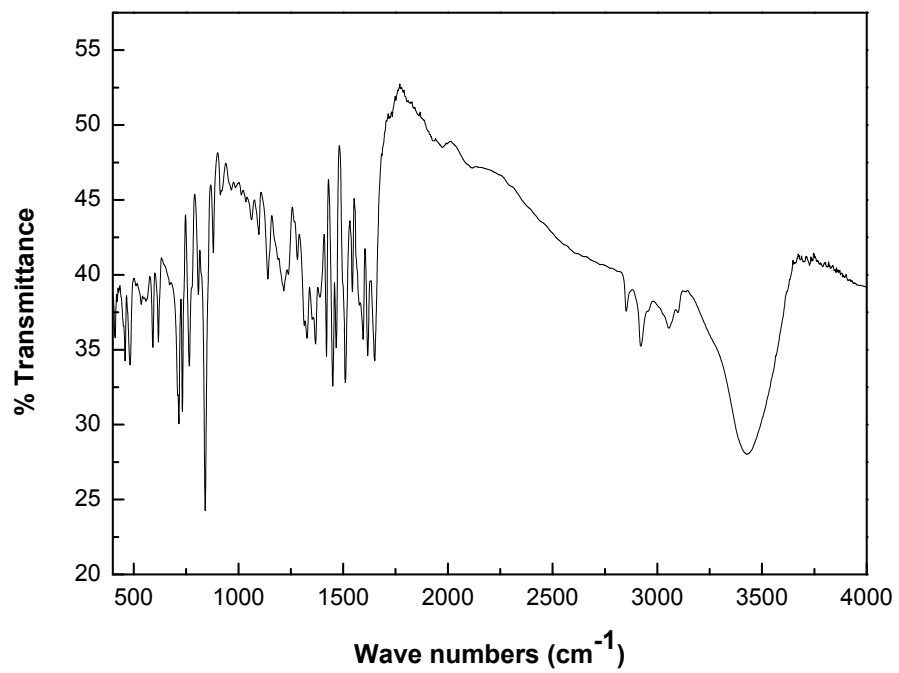

The IR curve of 7

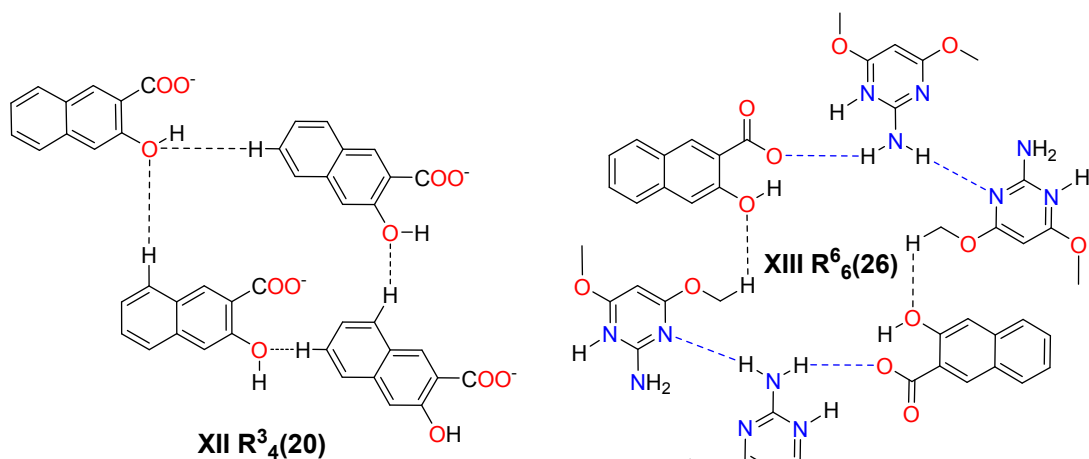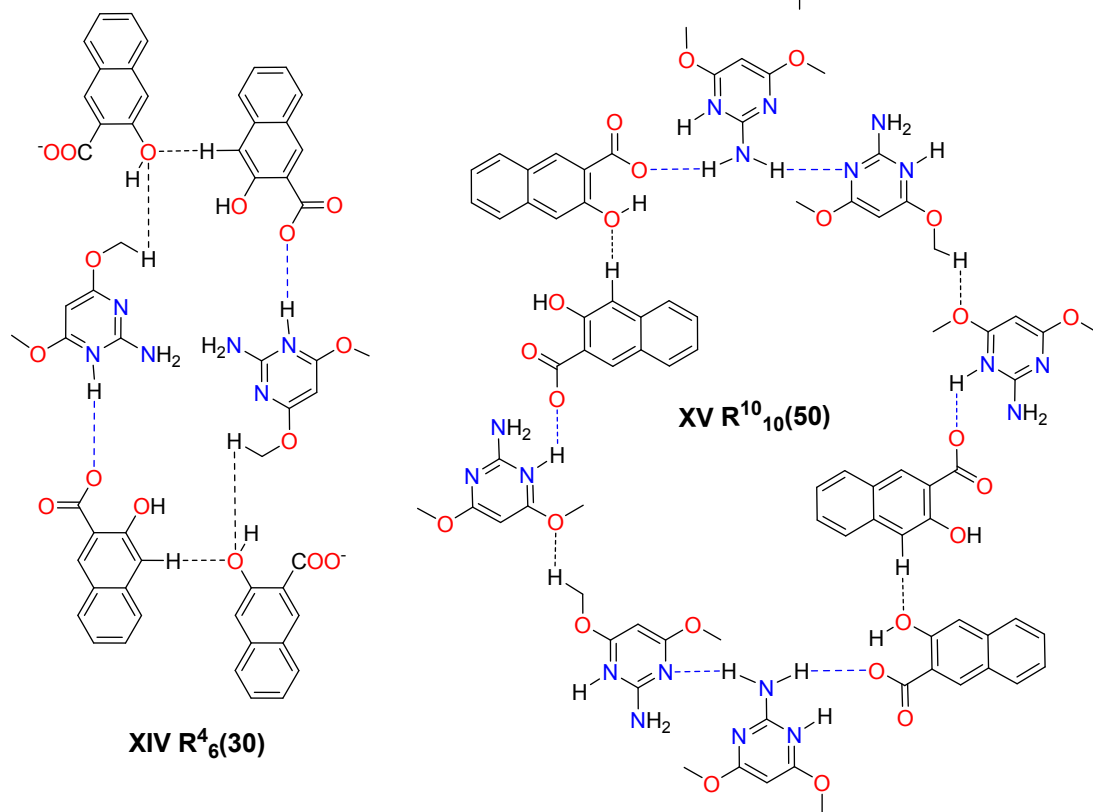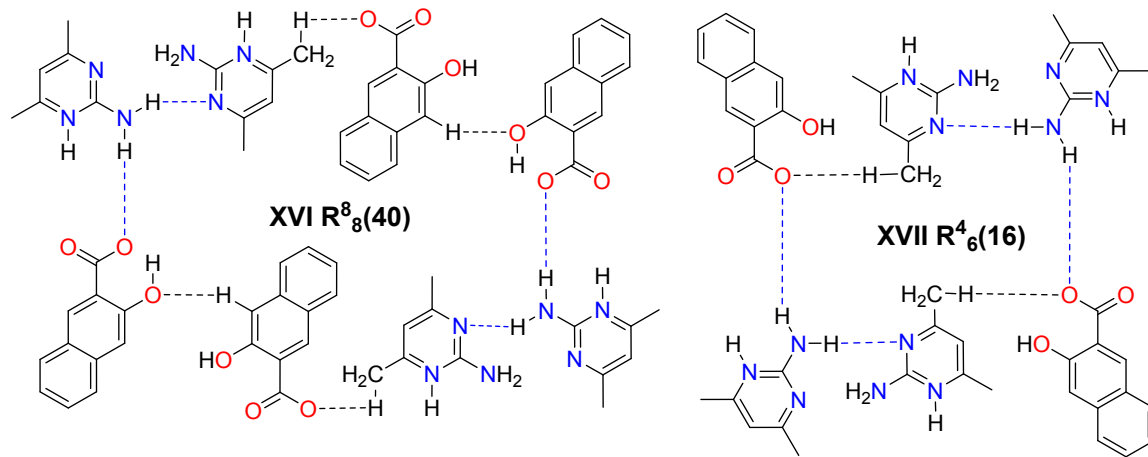

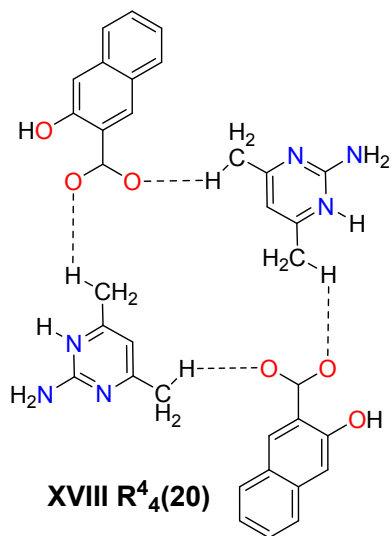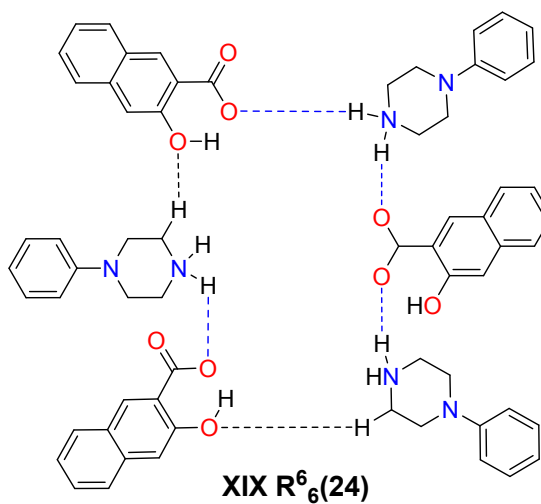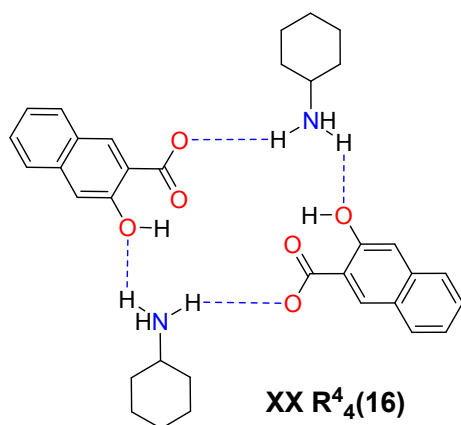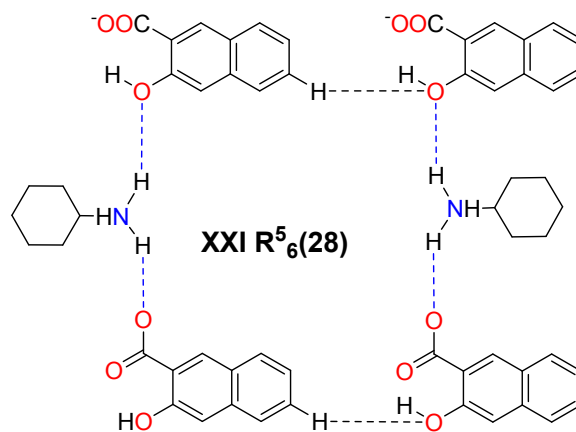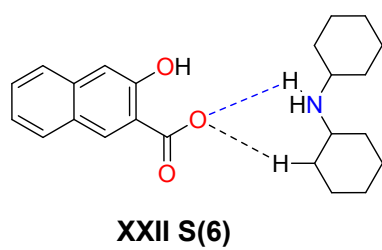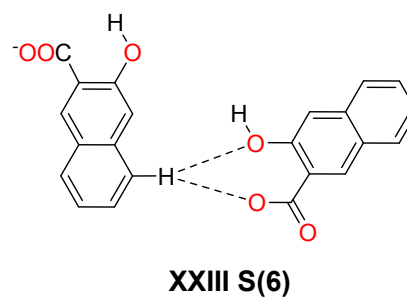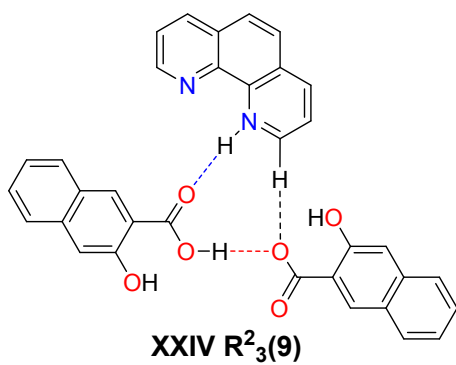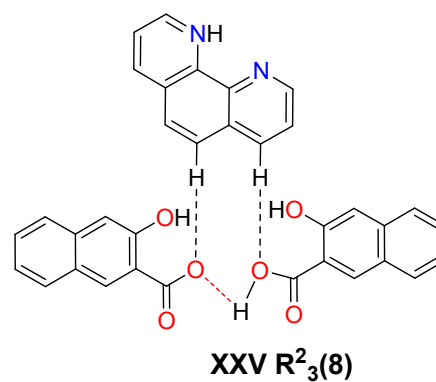

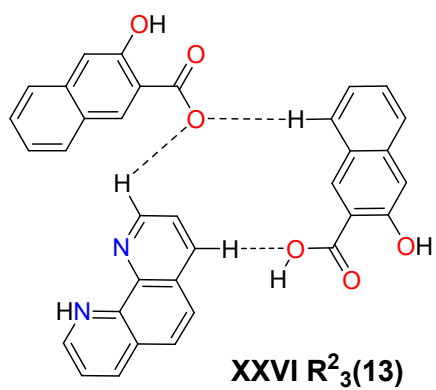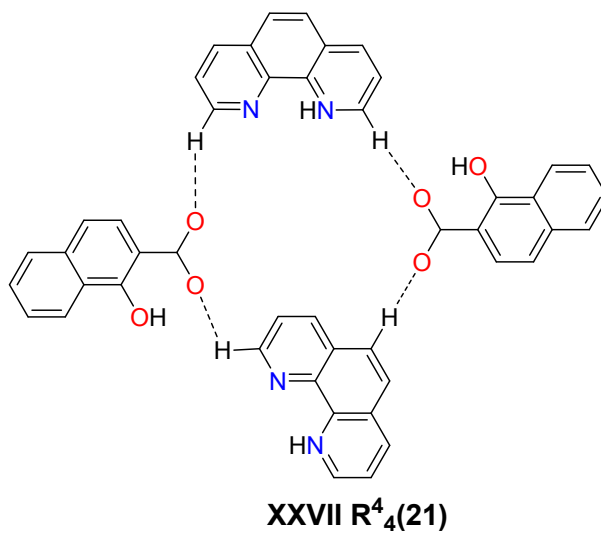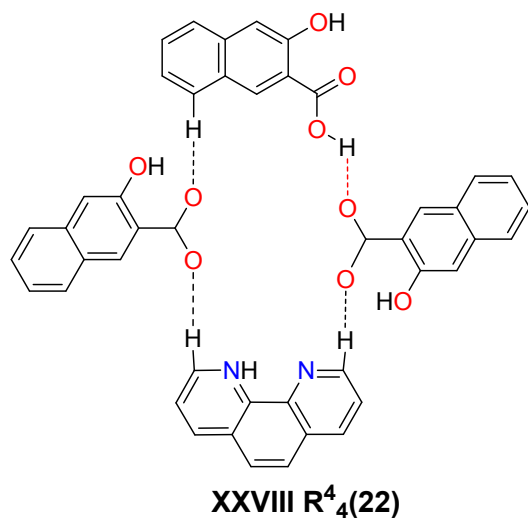

**Synthons Anticipated and/or Observed in the Crystal Structures 1–7**
